# Supplementary material
Source: ML conference proceedings conference paper supplement (https://openreview.net/forum?id=8S6ZeKB8tu)
Supplement: supplementary_material [file attachment]

# Groebner basis for three correlated classifiers

## Code

```
In[*]:= piRules = {P1,α → π1,α + fα,α,α + fα,α,β + fα,β,α + fα,β,β, P1,β → π1,β + fβ,α,α + fβ,α,β + fβ,β,α + fβ,β,β,
  P2,α → π2,α + fα,α,α + fα,α,β + fβ,α,α + fβ,α,β, P2,β → π2,β + fα,β,α + fα,β,β + fβ,β,α + fβ,β,β,
  P3,α → π3,α + fα,α,α + fα,β,α + fβ,α,α + fβ,β,α, P3,β → π3,β + fα,α,β + fα,β,β + fβ,α,β + fβ,β,β};

In[*]:= gammaRules = {
  Γ1,2,α → γ1,2,α + fα,α,α + fα,α,β - (fα,α,α + fα,α,β + fα,β,α + fα,β,β) (fα,α,α + fα,α,β + fβ,α,α + fβ,α,β),
  Γ1,2,β →
  γ1,2,β + fβ,β,α + fβ,β,β - (fα,β,α + fα,β,β + fβ,β,α + fβ,β,β) (fβ,α,α + fβ,α,β + fβ,β,α + fβ,β,β),
  Γ1,3,α →
  γ1,3,α + fα,α,α + fα,β,α - (fα,α,α + fα,α,β + fα,β,α + fα,β,β) (fα,α,α + fα,β,α + fβ,α,α + fβ,β,α),
  Γ1,3,β →
  γ1,3,β + fβ,α,β + fβ,β,β - (fα,α,β + fα,β,β + fβ,α,β + fβ,β,β) (fβ,α,α + fβ,α,β + fβ,β,α + fβ,β,β),
  Γ2,3,α →
  γ2,3,α + fα,α,α + fβ,α,α - (fα,α,α + fα,α,β + fβ,α,α + fβ,α,β) (fα,α,α + fα,β,α + fβ,α,α + fβ,β,α),
  Γ2,3,β →
  γ2,3,β + fα,β,β + fβ,β,β - (fα,α,β + fα,β,β + fβ,α,β + fβ,β,β) (fα,β,α + fα,β,β + fβ,β,α + fβ,β,β)};
```

## The raw Groebner basis

```

In[*]:= generatingSet3CorrelatedClassifiers =
{
  -fα,α,α + Pα (Pi,α Pj,α Pk,α + Pk,α Γi,j,α + Pj,α Γi,k,α + Pi,α Γj,k,α + Γi,j,k,α) +
  Pβ ((1 - Pi,β) (1 - Pj,β) (1 - Pk,β) + (1 - Pk,β) Γi,j,β +
  (1 - Pj,β) Γi,k,β + (1 - Pi,β) Γj,k,β - Γi,j,k,β),
  -fα,α,β + Pα (Pi,α Pj,α (1 - Pk,α) + (1 - Pk,α) Γi,j,α - Pj,α Γi,k,α - Pi,α Γj,k,α - Γi,j,k,α) +
  Pβ ((1 - Pi,β) (1 - Pj,β) Pk,β + Pk,β Γi,j,β - (1 - Pj,β) Γi,k,β - (1 - Pi,β) Γj,k,β + Γi,j,k,β),
  -fα,β,α + Pα (Pi,α (1 - Pj,α) Pk,α - Pk,α Γi,j,α + (1 - Pj,α) Γi,k,α - Pi,α Γj,k,α - Γi,j,k,α) +
  Pβ ((1 - Pi,β) Pj,β (1 - Pk,β) - (1 - Pk,β) Γi,j,β + Pj,β Γi,k,β - (1 - Pi,β) Γj,k,β + Γi,j,k,β),
  -fα,β,β + Pα (Pi,α (1 - Pj,α) (1 - Pk,α) - (1 - Pk,α) Γi,j,α - (1 - Pj,α) Γi,k,α + Pi,α Γj,k,α +
  Γi,j,k,α) + Pβ ((1 - Pi,β) Pj,β Pk,β - Pk,β Γi,j,β - Pj,β Γi,k,β + (1 - Pi,β) Γj,k,β - Γi,j,k,β),
  -fβ,α,α + Pα ((1 - Pi,α) Pj,α Pk,α - Pk,α Γi,j,α - Pj,α Γi,k,α + (1 - Pi,α) Γj,k,α - Γi,j,k,α) +
  Pβ (Pi,β (1 - Pj,β) (1 - Pk,β) - (1 - Pk,β) Γi,j,β - (1 - Pj,β) Γi,k,β + Pi,β Γj,k,β + Γi,j,k,β),
  -fβ,α,β + Pα ((1 - Pi,α) Pj,α (1 - Pk,α) - (1 - Pk,α) Γi,j,α +
  Pj,α Γi,k,α - (1 - Pi,α) Γj,k,α + Γi,j,k,α) +
  Pβ (Pi,β (1 - Pj,β) Pk,β - Pk,β Γi,j,β + (1 - Pj,β) Γi,k,β - Pi,β Γj,k,β - Γi,j,k,β), -fβ,β,α +
  Pα ((1 - Pi,α) (1 - Pj,α) Pk,α + Pk,α Γi,j,α - (1 - Pj,α) Γi,k,α - (1 - Pi,α) Γj,k,α + Γi,j,k,α) +
  Pβ (Pi,β Pj,β (1 - Pk,β) + (1 - Pk,β) Γi,j,β - Pj,β Γi,k,β - Pi,β Γj,k,β - Γi,j,k,β), -fβ,β,β +
  Pα ((1 - Pi,α) (1 - Pj,α) (1 - Pk,α) + (1 - Pk,α) Γi,j,α + (1 - Pj,α) Γi,k,α + (1 - Pi,α) Γj,k,α -
  Γi,j,k,α) + Pβ (Pi,β Pj,β Pk,β + Pk,β Γi,j,β + Pj,β Γi,k,β + Pi,β Γj,k,β + Γi,j,k,β)};

In[*]:= vars = Variables /@ generatingSet3CorrelatedClassifiers // Flatten //
Cases[#, Except[f_]] & // DeleteDuplicates // Sort //
SortBy[#, {Length@#, Last@#, First@#} &] &

Out[*]:=
{Pα, Pβ, Pi,α, Pj,α, Pk,α, Pi,β, Pj,β, Pk,β,
  Γi,j,α, Γi,k,α, Γj,k,α, Γi,j,β, Γi,k,β, Γj,k,β, Γi,j,k,α, Γi,j,k,β}

```

Variable and monomial orderings are crucial to Groebner basis calculations. Using standard monomial orderings such as Lexicographic or Reverse Lexicographic do not return from this calculation or take a large time to do so. The following monomial ordering is exploiting our knowledge of the symmetries in the variables and the polynomials.

```

In[*]:= elimType = {{1, 1, 0, 0, 0, 0, 0, 0, 0, 0, 0, 0, 0, 0, 0, 0},
  {0, -1, 0, 0, 0, 0, 0, 0, 0, 0, 0, 0, 0, 0, 0, 0}, {0, 0, 1, 1, 1, 1, 1, 1,
    0, 0, 0, 0, 0, 0, 0, 0}, {0, 0, 0, 0, 0, 0, 0, 0, -1, 0, 0, 0, 0, 0, 0, 0},
  {0, 0, 0, 0, 0, 0, 0, -1, 0, 0, 0, 0, 0, 0, 0, 0}, {0, 0, 0, 0, 0, 0, -1, 0, 0,
    0, 0, 0, 0, 0, 0}, {0, 0, 0, 0, 0, -1, 0, 0, 0, 0, 0, 0, 0, 0, 0, 0},
  {0, 0, 0, -1, 0, 0, 0, 0, 0, 0, 0, 0, 0, 0, 0, 0}, {0, 0, 0, 0, 0, 0, 0, 0, 0,
    1, 1, 1, 1, 1, 1, 0, 0}, {0, 0, 0, 0, 0, 0, 0, 0, 0, 0, 0, 0, 0, 0, -1, 0, 0},
  {0, 0, 0, 0, 0, 0, 0, 0, 0, 0, 0, 0, 0, -1, 0, 0, 0}, {0, 0, 0, 0, 0, 0, 0, 0, 0,
    0, 0, -1, 0, 0, 0, 0, 0}, {0, 0, 0, 0, 0, 0, 0, 0, 0, 0, -1, 0, 0, 0, 0, 0},
  {0, 0, 0, 0, 0, 0, 0, 0, 0, 0, -1, 0, 0, 0, 0, 0, 0}, {0, 0, 0, 0, 0, 0, 0, 0, 0,
    0, 0, 0, 0, 0, 1, 1}, {0, 0, 0, 0, 0, 0, 0, 0, 0, 0, 0, 0, 0, 0, 0, 0, -1}};

In[*]:= Timing[gb = GroebnerBasis[generatingSet3CorrelatedClassifiers, Reverse@vars,
  MonomialOrder → elimType, CoefficientDomain → RationalFunctions]];

```

```

Out[*]:=
{2.76233, Null}

```

```

In[*]:= Length@gb
Out[*]:=

```

29

The variables in each of the basis polynomials

```

In[*]:= Column[Map[Variables, gb] // Map[Cases[#, Except[f_]]] &, #] & // Sort /@# &]
Out[*]=
{Pα, Pβ}
{Pα, Pi,α, Pi,β}
{Pα, Pj,α, Pj,β}
{Pα, Pk,α, Pk,β}
{Pi,α, Pi,β, Pj,α, Pj,β}
{Pi,α, Pi,β, Pk,α, Pk,β}
{Pj,α, Pj,β, Pk,α, Pk,β}
{Pα, Pi,α, Pj,β, Γi,j,α, Γi,j,β}
{Pi,α, Pi,β, Pj,β, Γi,j,α, Γi,j,β}
{Pi,α, Pj,α, Pj,β, Γi,j,α, Γi,j,β}
{Pi,α, Pj,α, Pj,β, Pk,α, Pk,β, Γi,j,α, Γi,j,β}
{Pα, Pi,α, Pk,β, Γi,k,α, Γi,k,β}
{Pi,α, Pi,β, Pk,β, Γi,k,α, Γi,k,β}
{Pi,α, Pj,α, Pj,β, Pk,β, Γi,k,α, Γi,k,β}
{Pi,α, Pk,α, Pk,β, Γi,k,α, Γi,k,β}
{Pα, Pj,α, Pk,β, Γj,k,α, Γj,k,β}
{Pi,α, Pi,β, Pj,α, Pj,β, Pk,β, Γj,k,α, Γj,k,β}
{Pj,α, Pj,β, Pk,β, Γj,k,α, Γj,k,β}
{Pj,α, Pk,α, Pk,β, Γj,k,α, Γj,k,β}
{Pi,α, Pi,β, Pj,β, Pk,β, Γi,j,α, Γi,j,β, Γi,k,α, Γi,k,β}
{Pi,α, Pi,β, Pj,α, Pj,β, Pk,β, Γi,j,α, Γi,j,β, Γj,k,α, Γj,k,β}
{Pi,α, Pi,β, Pj,α, Pj,β, Pk,β, Γi,k,α, Γi,k,β, Γj,k,α, Γj,k,β}
{Pα, Pi,α, Pi,β, Pj,α, Pj,β, Pk,β, Γi,j,α, Γi,k,α, Γj,k,α, Γi,j,k,α, Γi,j,k,β}
{Pi,α, Pi,β, Pj,α, Pj,β, Pk,β, Γi,j,α, Γi,k,α, Γj,k,α, Γi,j,k,α, Γi,j,k,β}
{Pi,α, Pi,β, Pj,α, Pj,β, Pk,β, Γi,j,α, Γi,k,α, Γj,k,α, Γi,j,k,α, Γi,j,k,β}
{Pi,α, Pi,β, Pj,α, Pj,β, Pk,α, Pk,β, Γi,j,α, Γi,k,α, Γj,k,α, Γi,j,k,α, Γi,j,k,β}
{Pi,α, Pi,β, Pj,α, Pj,β, Pk,β, Γi,j,α, Γi,j,β, Γi,k,α, Γi,k,β, Γj,k,α, Γj,k,β, Γi,j,k,α, Γi,j,k,β}
{Pi,α, Pi,β, Pj,α, Pj,β, Pk,β, Γi,j,α, Γi,k,α, Γi,k,β, Γj,k,α, Γj,k,β, Γi,j,k,α, Γi,j,k,β}
{Pi,α, Pi,β, Pj,α, Pj,β, Pk,β, Γi,j,α, Γi,k,α, Γj,k,α, Γj,k,β, Γi,j,k,α, Γi,j,k,β}

```

The first polynomial in the basis asserts that the frequencies must sum to one for the ideal to be well-defined.

```

In[*]:= gb // First
Out[*]=
Pα + Pβ - fα,α,α - fα,α,β - fα,β,α - fα,β,β - fβ,α,α - fβ,α,β - fβ,β,α - fβ,β,β

```

---

## New variables to make highlight the blind spots in the evaluation ideal

```

In[*]:= ((gb[[2]] /. {i → 1, j → 2, k → 3}) /. piRules) // Expand // Simplify //
  (# /. { (fβ,β,β) → 1 - (fα,α,α + fα,α,β + fα,β,α + fα,β,β + fβ,α,α + fβ,α,β + fβ,β,α) }) &
Out[*]:=
  π1,β - Pα (π1,α + π1,β)

In[*]:= ((gb[[5]] /. {i → 1, j → 2, k → 3}) /. piRules) // Simplify //
  (# /. { (fβ,β,β) → 1 - (fα,α,α + fα,α,β + fα,β,α + fα,β,β + fβ,α,α + fβ,α,β + fβ,β,α) }) & // Simplify
Out[*]:=
  -π1,β π2,α + π1,α π2,β

In[*]:= ((gb[[8]] /. {i → 1, j → 2, k → 3}) /. Join[piRules, gammaRules]) // Simplify //
  (# /. { (fβ,β,β) → 1 - (fα,α,α + fα,α,β + fα,β,α + fα,β,β + fβ,α,α + fβ,α,β + fβ,β,α) }) & // Simplify
Out[*]:=
  -π1,α π2,β - γ1,2,β + Pα (-γ1,2,α + γ1,2,β)

In[*]:= ((gb[[9]] /. {i → 1, j → 2, k → 3}) /. Join[piRules, gammaRules]) // Simplify //
  (# /. { (fβ,β,β) → 1 - (fα,α,α + fα,α,β + fα,β,α + fα,β,β + fβ,α,α + fβ,α,β + fβ,β,α) }) & //
  Simplify // Factor
Out[*]:=
  π1,α2 π2,β + π1,α π1,β π2,β + π1,β γ1,2,α + π1,α γ1,2,β

In[*]:= ((gb[[11]] /. {i → 1, j → 2, k → 3}) /. Join[piRules, gammaRules]) // Simplify //
  (# /. { (fβ,β,β) → 1 - (fα,α,α + fα,α,β + fα,β,α + fα,β,β + fβ,α,α + fβ,α,β + fβ,β,α) }) & // Simplify
Out[*]:=
  π1,α (π2,α + π2,β) π3,β + π3,β γ1,2,α + π3,α γ1,2,β

In[*]:= ((gb[[20]] /. {i → 1, j → 2, k → 3}) /. Join[piRules, gammaRules]) // Simplify //
  (# /. { (fβ,β,β) → 1 - (fα,α,α + fα,α,β + fα,β,α + fα,β,β + fβ,α,α + fβ,α,β + fβ,β,α) }) & //
  Simplify // -# &
Out[*]:=
  -γ1,2,β γ1,3,α - π1,α (-π3,β γ1,2,α + π2,β γ1,3,α) - π1,β (-π3,β γ1,2,α + π2,β γ1,3,α) + γ1,2,α γ1,3,β

```
