# Supplementary material
Source: ML conference proceedings conference paper supplement (https://openreview.net/forum?id=8S6ZeKB8tu)
Supplement: supplementary_material [file attachment]

# Algebraic Failures: The UCI Adult dataset

An experimental demonstration, using the UCI **adult** dataset, that the failures of the independent stream evaluator for binary classifiers can be used to find nearly independent trios on unlabeled data.

We read some common code for the three datasets

```
In[*]:=
nbDir = NotebookDirectory[];
SetDirectory[nbDir];
NotebookEvaluate[FileNameJoin[{nbDir, "CommonCode.nb"}]]
```

---

## Getting the data and taking a look at the available features

```
In[*]:= {tsvHeader, benchmarkData} = ImportPennMLBenchmarksDataset["adult"];

In[*]:= tsvHeader
Out[*]=
{age, workclass, fnlwgt, education, education-num,
 marital-status, occupation, relationship, race, sex, capital-gain,
 capital-loss, hours-per-week, native-country, target}

In[*]:= uciAdultFeatures
Out[*]=
{{1, Numerical}, {2, Nominal}, {3, Numerical}, {4, Nominal}, {5, Nominal},
 {6, Nominal}, {7, Nominal}, {8, Nominal}, {9, Nominal}, {10, Nominal},
 {11, Numerical}, {12, Numerical}, {13, Numerical}, {14, Nominal}}

In[*]:= (* A blessed set found to be good enough in previous runs, being used here
to 'debug' any problems before a new search is started. *)
classifiersFeatures = {{2, "Nominal"}, {4, "Nominal"}, {14, "Nominal"}},
{{3, "Numerical"}, {9, "Nominal"}, {11, "Numerical"}},
{{6, "Nominal"}, {8, "Nominal"}, {13, "Numerical"}}

Out[*]=
{{{2, Nominal}, {4, Nominal}, {14, Nominal}},
 {{3, Numerical}, {9, Nominal}, {11, Numerical}},
 {{6, Nominal}, {8, Nominal}, {13, Numerical}}}
```

```
In[*]:= Length/@benchmarkData
Out[*]:=
<| 1 → 37 155, 0 → 11 687 |>
```

## Independent AE failure modes

Define a sample of disjoint feature partitions to use in the experiments

```
In[*]:= featurePartitions = Table[RandomSample[uciAdultFeatures] //
    Partition[#, UpTo@3] & //
    Take[#, 3] &, {1000}] //
    Map[Sort, #, {2}] & // Sort/@# & // DeleteDuplicates //
    RandomSample[#, 100] &;
Length@featurePartitions
Out[*]:=
100
```

### Number of decision patterns as a function of test size

A successful evaluation requires that all 8 decision patterns be observed. How does the count of observed decision patterns vary as a function of test sample size?

### No independent model solution as a function of sample size

We saw in the results above that we could go from 14 to 4 percent correlation but the distance decreased by 7 orders of magnitude. How is the distance from the zero evaluation variety related to, say, the maximum correlation between the classifiers?

- Getting runs from 100 to 1000 in steps of 100

```
In[*]:= nTrain = 200;
globalTrainSize = 600;
nClassifiers = 3;
classifierTypes = Table[{"LogisticRegression", "L1Regularization" → 0.1,
    "L2Regularization" → 0.5, "OptimizationMethod" → "Newton"}, {nClassifiers}];
(* We separate a held-out test set that is never seen in any of the training
    runs below *)
aTrainIndices = RandomSample[Range@Length@benchmarkData[0], globalTrainSize];
bTrainIndices = RandomSample[Range@Length@benchmarkData[1], globalTrainSize];
globalTrainTestSplit =
    MakeTrainTestSplit[benchmarkData, aTrainIndices, bTrainIndices];
globalTrainData = SelectTrainDataFromSplit[globalTrainTestSplit];
globalH0Data = SelectTestDataFromSplit[globalTrainTestSplit];
Timing[runs = Table[nTest → Table[
    (* Select random, disjoint partitions of the training data,
```

```

grouped by classifier *)
trainIndices = Transpose@{
  (* The disjoint partition of a subset of the alpha training data *)
  ClassifiersSampleIndices[globalTrainData[0], nTrain],
  (* The disjoint partition of a subset of the beta training data *)
  ClassifiersSampleIndices[globalTrainData[1], nTrain]};
(* Prepare the training data for the current feature partitions *)
trainClassifiersData = Table[Map[#[[First@Transpose@features]] &,
  globalTrainData, {2}], {features, classifiersFeatures}];
classifiers = TrainClassifiersDisjoint[
  trainClassifiersData, classifierTypes, trainIndices,
  Map[(Last@Transpose@#) &, classifiersFeatures], "TrainingSpeed"];

(* Now evaluate *)
evalIndices = {
  (* The disjoint partition of a subset of the alpha training data *)
  SampleIndices[globalH0Data[0], nTest],
  (* The disjoint partition of a subset of the beta training data *)
  SampleIndices[globalH0Data[1], nTest]};
testClassifiersData = Table[Map[#[[First@Transpose@features]] &,
  SelectFromData[globalH0Data, First@evalIndices, Last@evalIndices],
  {2}], {features, classifiersFeatures}];
vcbl = LabelCounts[classifiers, testClassifiersData];
Which[
  Not@HasAllDecisionFrequenciesQ@vcbl,
  {0, 0, 0, 0},
  Not@IndependentEvaluationIdealIsEmptyQ@vcbl,
  {1, 0, 0, 0},
  sols = AlgebraicallyEvaluateClassifiers[vcbl];
  Not@HasOnlyRealNumbersQ@sols,
  {1, 1, 0, 0},
  Not@InsideUnitCubeQ@sols,
  {1, 1, 1, 0},
  True,
  {1, 1, 1, 1}],
{classifiersFeatures, featurePartitions},
{10}],
{nTest, 100, 1000, 100}];]

```

Out[8]=

{8488.51, Null}

Timings: 8303.07, 8345.55

```
In[8]:= sortedRuns =  
  Map[ (Map[Counts, #] // Map[KeySort, #] & // Counts // KeySortBy[#, Lookup[#,  
    Key@{1, 1, 1, 1}, 0] &] & // Reverse) &, Association@runs];
```
