# Supplementary material
Source: ML conference proceedings conference paper supplement (https://openreview.net/forum?id=8S6ZeKB8tu)
Supplement: supplementary_material [file attachment]

# Algebraic Failures: The mushroom dataset

An experimental demonstration, using the UCI **mushroom** dataset, that the failures of the independent stream evaluator for binary classifiers can be used to find nearly independent trios on unlabeled data.

We read some common code for the three datasets

```
In[*]:= nbDir = NotebookDirectory[];  
SetDirectory[nbDir];  
NotebookEvaluate[FileNameJoin[{nbDir, "CommonCode.nb"}]]
```

---

## Getting the data and taking a look at the available features

```
In[*]:= {tsvHeader, benchmarkData} = ImportPennMLBenchmarksDataset["mushroom"];  
  
In[*]:= tsvHeader  
Out[*]:=  
{cap-shape, cap-surface, cap-color, bruises?, odor,  
 gill-attachment, gill-spacing, gill-size, gill-color, stalk-shape,  
 stalk-root, stalk-surface-above-ring, stalk-surface-below-ring,  
 stalk-color-above-ring, stalk-color-below-ring, veil-type, veil-color,  
 ring-number, ring-type, spore-print-color, population, habitat, target}  
  
In[*]:= mushroomFeatures  
Out[*]:=  
{{1, Nominal}, {2, Nominal}, {3, Nominal}, {4, Nominal}, {5, Nominal}, {6, Nominal},  
 {7, Nominal}, {8, Nominal}, {9, Nominal}, {10, Nominal}, {11, Nominal}, {12, Nominal},  
 {13, Nominal}, {14, Nominal}, {15, Nominal}, {16, Nominal}, {17, Nominal},  
 {18, Nominal}, {19, Nominal}, {20, Nominal}, {21, Nominal}, {22, Nominal}}  
  
In[*]:= Length /@ benchmarkData  
Out[*]:=  
<| 0 → 4208, 1 → 3916 |>
```

---

## Independent AE failure modes

Define a sample of disjoint feature partitions to use in the experiments

```

In[*]:= featurePartitions = Table[RandomSample[mushroomFeatures] //
    Partition[#, UpTo@3] & //
    Take[#, 3] &, {1000}] //
    Map[Sort, #, {2}] & // Sort /@# & // DeleteDuplicates //
    RandomSample[#, 100] &;
Length@featurePartitions

Out[*]=
100

```

## Number of decision patterns as a function of test size

- Getting runs from 100 to 1000 in steps of 100

```

In[*]:= nTrain = 200;
globalTrainSize = 600;
nClassifiers = 3;
classifierTypes = Table[{"LogisticRegression", "L1Regularization" → 0.1,
    "L2Regularization" → 0.5, "OptimizationMethod" → "Newton"}, {nClassifiers}];
(* We separate a held-out test set that is never seen in any of the training
    runs below *)
aTrainIndices = RandomSample[Range@Length@benchmarkData[0], globalTrainSize];
bTrainIndices = RandomSample[Range@Length@benchmarkData[1], globalTrainSize];
globalTrainTestSplit =
    MakeTrainTestSplit[benchmarkData, aTrainIndices, bTrainIndices];
globalTrainData = SelectTrainDataFromSplit[globalTrainTestSplit];
globalH0Data = SelectTestDataFromSplit[globalTrainTestSplit];
Timing[runs = Table[nTest → Table[
    (* Select random, disjoint partitions of the training data,
        grouped by classifier *)
    trainIndices = Transpose@{
        (* The disjoint partition of a subset of the alpha training data *)
        ClassifiersSampleIndices[globalTrainData[0], nTrain],
        (* The disjoint partition of a subset of the beta training data *)
        ClassifiersSampleIndices[globalTrainData[1], nTrain]};
    (* Prepare the training data for the current feature partitions *)
    trainClassifiersData = Table[Map[#[[First@Transpose@features]] &,
        globalTrainData, {2}], {features, classifiersFeatures}];
    classifiers = TrainClassifiersDisjoint[
        trainClassifiersData, classifierTypes, trainIndices,
        Map[(Last@Transpose@#) &, classifiersFeatures], "TrainingSpeed"];

    (* Now evaluate *)
    evalIndices = {
        (* The disjoint partition of a subset of the alpha training data *)

```

```

SampleIndices[globalH0Data[0], nTest],
(* The disjoint partition of a subset of the beta training data *)
SampleIndices[globalH0Data[1], nTest]];
testClassifiersData = Table[Map[#[[First@Transpose@features]] &,
  SelectFromData[globalH0Data, First@evalIndices, Last@evalIndices],
  {2}], {features, classifiersFeatures}];
vcbl = LabelCounts[classifiers, testClassifiersData];
Which[
  Not@HasAllDecisionFrequenciesQ@vcbl,
  {0, 0, 0, 0},
  Not@IndependentEvaluationIdealIsEmptyQ@vcbl,
  {1, 0, 0, 0},
  sols = AlgebraicallyEvaluateClassifiers[vcbl];
  Not@HasOnlyRealNumbersQ@sols,
  {1, 1, 0, 0},
  Not@InsideUnitCubeQ@sols,
  {1, 1, 1, 0},
  True,
  {1, 1, 1, 1}],
{classifiersFeatures, featurePartitions},
{10}],
{nTest, 100, 1000, 100}];]

```

Out[ ]=

```
{21474.3, Null}
```

Timings: 21409.1,

In[ ]:= sortedRuns =

```

Map[(Map[Counts, #] // Map[KeySort, #] & // Counts // KeySortBy[#, Lookup[#,
  Key@{1, 1, 1, 1}, 0] &] & // Reverse) &, Association@runs];

```
